# Supplementary material for: Elevated glucose increases methicillin-resistant Staphylococcus aureus antibiotic tolerance in a cystic fibrosis airway epithelial cell infection model
Source: Research Square preprint supplement (doi:10.21203/rs.3.rs-5938603/v1), 2025-02-17
Supplement: Supplementary file 1 [file 43f4e08aa14ea284402791a6.docx]

**Supplementary material**

**Supplemental Figure Legends:**

**Supplemental Figure 1: Bronchial cell monolayers are not adversely affected by culturing in hyperglycemic media or with 2DG.** A) Transepithelial electrical resistance (TEER) levels non-CF (circles) or CF (squares) cells. B) Lactate dehydrogenase (LDH) levels non-CF (circles) or CF (squares) cells. Data is reported as mean.

**Supplemental Figure 2: Cell types maintained expected pro-inflammatory cytokine differences.** A) IL-6 transcript levels B) IL-8 transcript levels & C) IL-1β transcript levels. Data reported as mean ± SEM. *P < 0.05, **P < 0.01, P < 0.001, ****P < 0.0001

**Supplemental Figure 3: *S. aureus* does not exhibit frequent development of antibiotic resistance in SCFM.** A) CFUs of resistant *S. aureus* when RIF is co-inoculated at T = 0hr with bacteria in SCFM. B) CFUs of resistant *S. aureus* when RIF is added after T = 6 hr of *S. aureus* growth in antibiotic-free SCFM. Data shown as mean ± SEM. *P > 0.05

**Supplemental Figures:**

**Figure S1.**

**Figure S2.**

**Figure S3.**
